# Supplementary material for: Association between gallstones and the risk of biliary tract cancer: a systematic review and meta-analysis
Source: PubMed Central journal article supplement (PMC8060519; doi:10.4178/epih.e2021011), 2021-02-03
Supplement: epih-43-e2021011-suppl1.pdf [file epih-43-e2021011-suppl1.pdf]

**SUPPLEMENTARY MATERIALS**

(A)

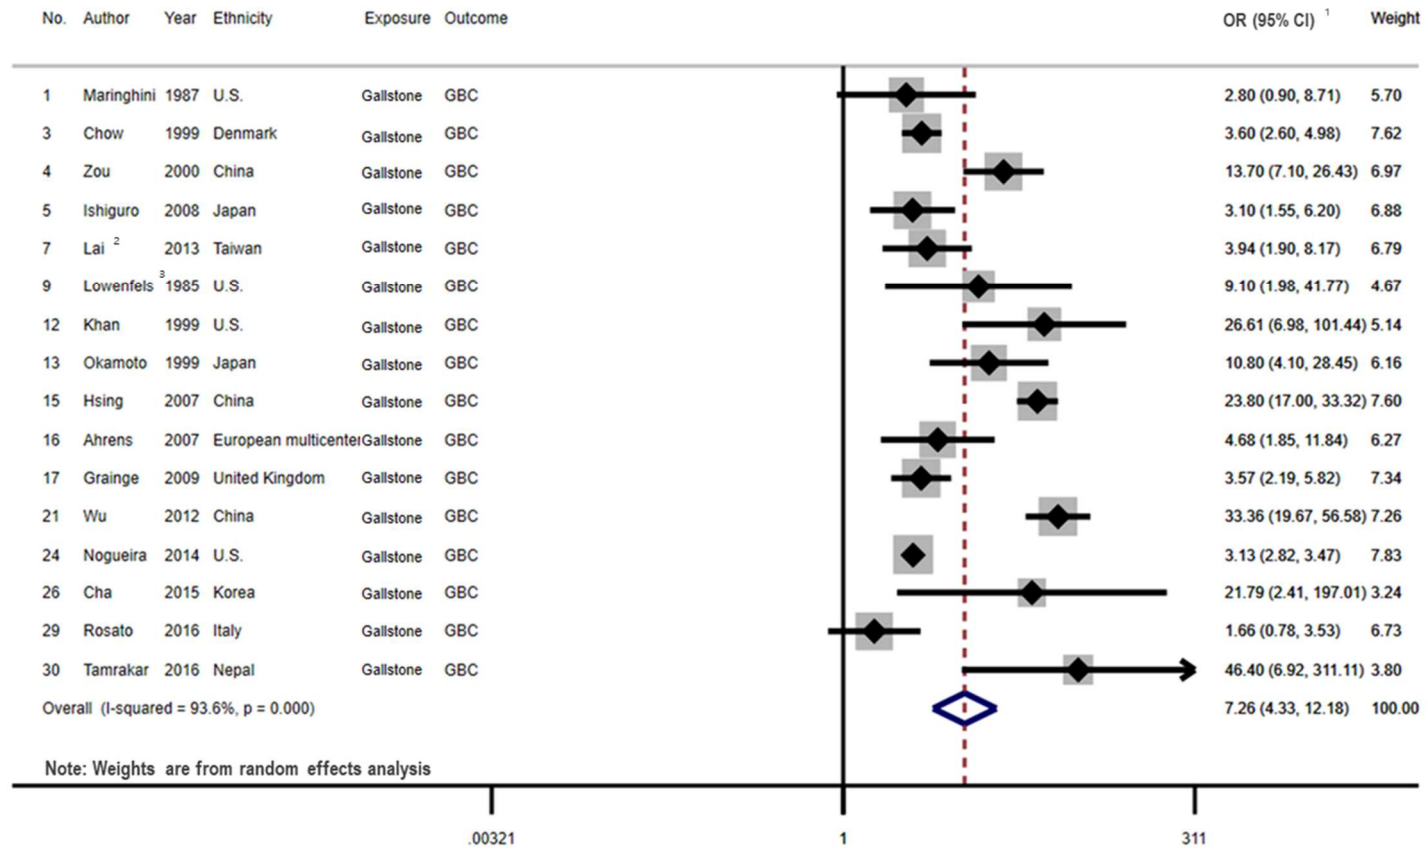



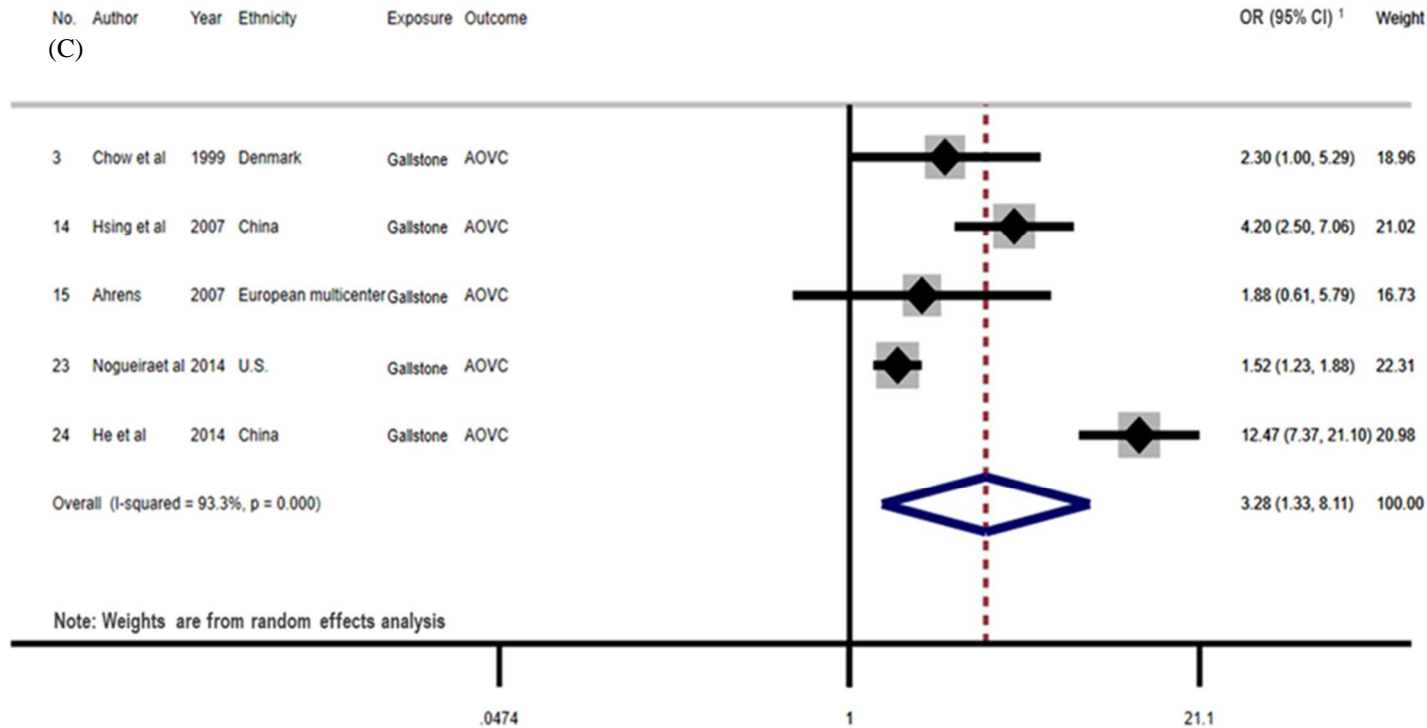

**Supplementary Material 1.** Forest plot showing the relationship between presence of gallstone and the risk of (A) GBC, (B) EBDC, and (C) AVOC. <sup>1</sup>OR (95% CI) refers to the estimate of effects included in a random effects model. <sup>2</sup>Effect size of Lai et al. [27] was calculated by pooling the results of DM group and non-DM group. <sup>3</sup> Effect size of Lowenfels et al. [29] was calculated by pooling the results of indian and non-indian. <sup>4</sup>Pooled the risk estimates of cholecystolithiasis and choledocholithiasis group. <sup>5</sup>Pooled the risk estimates of CCA and EBDC group. The numbers are arranged in the order of Table 1. OR, odds ratio; CI, confidence interval; GBC, gallbladder cancer; BTC, biliary tract cancer; EBDC, extrahepatic bile duct cancer; AOVC, ampulla of Vater cancer.
