# Supplementary material for: Association between gallstones and the risk of biliary tract cancer: a systematic review and meta-analysis
Source: PubMed Central journal article supplement (PMC8060519; doi:10.4178/epih.e2021011), 2021-02-03
Supplement: epih-43-e2021011-suppl2.pdf [file epih-43-e2021011-suppl2.pdf]

**Supplementary Material 2. Meta-analysis results for association between the presence of gallstone and the risk of GBC by the subgroups**

| Subgroup                             | No. of study | OR (95%CI) <sup>1</sup> | I <sup>2</sup> value (%) | P for heterogeneity |
|--------------------------------------|--------------|-------------------------|--------------------------|---------------------|
| All studies                          | 16           | 7.26 (4.33-12.18)       | 93.6                     | <0.001              |
| <b>Study design</b>                  |              |                         |                          |                     |
| Cohort study                         | 5            | 4.54 (2.62-7.87)        | 72.5                     | 0.006               |
| Case-control study                   | 11           | 9.60 (4.45-20.70)       | 95.4                     | <0.001              |
| <b>Sex</b>                           |              |                         |                          |                     |
| Male                                 | 6            | 6.69 (3.13-14.31)       | 74.8                     | 0.001               |
| Female                               | 6            | 6.69 (2.46-18.15)       | 87.4                     | <0.001              |
| <b>Geographic area</b>               |              |                         |                          |                     |
| Asia                                 | 8            | 12.72 (6.35-25.46)      | 86.2                     | <0.001              |
| Non-Asia <sup>2</sup>                | 8            | 3.59 (2.68-4.81)        | 56.0                     | 0.026               |
| <b>Study period <sup>3</sup></b>     |              |                         |                          |                     |
| Before 2000                          | 6            | 6.22 (3.24-11.95)       | 57.3                     | 0.039               |
| Around 2000                          | 5            | 4.54 (1.75-11.81)       | 97.0                     | <0.001              |
| After 2000                           | 2            | 33.59 (7.96-141.72)     | 0.0                      | 0.611               |
| No record                            | 3            | 11.66 (2.70-50.45)      | 96.3                     | 0.000               |
| <b>Measure of gallstone</b>          |              |                         |                          |                     |
| Medical record with imaging study    | 5            | 15.27 (7.48-31.18)      | 76.9                     | 0.002               |
| Medical record without imaging study | 11           | 4.67 (3.29-6.61)        | 76.1                     | <0.001              |
| <b>Study quality <sup>4</sup></b>    |              |                         |                          |                     |
| High NOS                             | 8            | 6.72 (2.80-16.10)       | 94.0                     | <0.001              |
| Low NOS                              | 8            | 7.25 (4.08-12.88)       | 83.8                     | <0.001              |
| Adjustment for age, yes              | 12           | 6.90 (3.80-12.51)       | 94.6                     | <0.001              |

|                                                    |    |                     |      |        |
|----------------------------------------------------|----|---------------------|------|--------|
| Adjustment for sex, yes                            | 11 | 7.83 (4.11-14.91)   | 95.2 | <0.001 |
| Adjustment for comorbidities, yes                  | 3  | 3.99 (2.14-7.45)    | 27.5 | 0.252  |
| Adjustment for lifestyle factors, yes <sup>5</sup> | 6  | 6.87 (3.36-14.04)   | 69.9 | 0.005  |
| Adjustment for education, yes                      | 1  | 23.80 (17.00-33.32) | -    | -      |
| Adjustment for geographic areas, yes               | 4  | 9.32 (2.95-29.37)   | 76.7 | 0.005  |

GBC, gallbladder cancer; OR, odds ratio; NOS, Newcastle-Ottawa scale.

<sup>1</sup> OR (Odds ratio) refers to summary estimate of effects based on random effects model. <sup>2</sup> Non-Asia including U.S. and European areas. <sup>3</sup> Study period is defined by the study's starting point (a) and ending point (b). Before 2000, (a) and (b) are both before 2000; Around 2000, (a) is before 2000 but (b) is after 2000; After 2000, (a) and (b) are both after 2000. <sup>4</sup> The quality scores equal or more than the median value was judged as high NOS ( $\geq 7$ ). <sup>5</sup> Adjustment for lifestyle factors such as alcohol, smoking, BMI, or etc..
