# Supplementary material for: Association between gallstones and the risk of biliary tract cancer: a systematic review and meta-analysis
Source: PubMed Central journal article supplement (PMC8060519; doi:10.4178/epih.e2021011), 2021-02-03
Supplement: epih-43-e2021011-suppl3.pdf [file epih-43-e2021011-suppl3.pdf]

**Supplementary Material 3. Meta-analysis results for association between presence of gallstone and the risk of EBDC by subgroups**

| Subgroup                             | No. of study    | OR (95%CI) <sup>1</sup> | I <sup>2</sup> value (%) | P for heterogeneity |
|--------------------------------------|-----------------|-------------------------|--------------------------|---------------------|
| All studies                          | 17              | 3.17 (2.24-4.50)        | 95.2                     | <0.001              |
| <b>Subsite</b>                       |                 |                         |                          |                     |
| EBDC (or EHC)                        | 12 <sup>2</sup> | 2.87 (2.06-3.99)        | 95.0                     | <0.001              |
| CCA (or BDC)                         | 6 <sup>2</sup>  | 2.12 (1.35-3.33)        | 92.7                     | <0.001              |
| <b>Study design</b>                  |                 |                         |                          |                     |
| Cohort study                         | 4               | 2.33 (2.00-2.72)        | 21.4                     | 0.282               |
| Case-control study                   | 13              | 3.67 (2.26-5.95)        | 96.0                     | <0.001              |
| <b>Sex</b>                           |                 |                         |                          |                     |
| Male                                 | 5               | 3.46 (2.29-5.22)        | 78.6                     | 0.001               |
| Female                               | 5               | 5.13 (2.73-9.66)        | 91.2                     | <0.001              |
| <b>Geographic area</b>               |                 |                         |                          |                     |
| Asia                                 | 9               | 3.48 (2.30-5.28)        | 83.6                     | <0.001              |
| Non-Asia <sup>3</sup>                | 8               | 2.99 (1.72-5.19)        | 97.4                     | <0.001              |
| <b>Study period <sup>4</sup></b>     |                 |                         |                          |                     |
| Before 2000                          | 5               | 4.43 (1.61-12.20)       | 97.2                     | <0.001              |
| Around 2000                          | 5               | 2.79 (1.80-4.32)        | 93.6                     | <0.001              |
| After 2000                           | 4               | 2.28 (0.79-6.55)        | 82.0                     | 0.001               |
| No record                            | 3               | 3.50 (1.66-7.35)        | 88.1                     | <0.001              |
| <b>Measure of gallstone</b>          |                 |                         |                          |                     |
| Medical record with imaging study    | 4               | 5.52 (3.07-9.93)        | 69.1                     | 0.021               |
| Medical record without imaging study | 11              | 2.60 (1.61-4.20)        | 96.4                     | <0.001              |
| No record                            | 2               | 3.47 (2.88-4.18)        | 17.1                     | 0.272               |
| <b>Study quality <sup>5</sup></b>    |                 |                         |                          |                     |

|                                                    |    |                   |      |        |
|----------------------------------------------------|----|-------------------|------|--------|
| High NOS                                           | 9  | 3.64 (2.37-5.59)  | 84.9 | <0.001 |
| Low NOS                                            | 8  | 2.79 (1.58-4.93)  | 97.5 | <0.001 |
| Adjustment for age, yes                            | 16 | 3.26 (2.23-4.78)  | 95.3 | <0.001 |
| Adjustment for sex, yes                            | 15 | 3.34 (2.26-4.94)  | 95.6 | <0.001 |
| Adjustment for comorbidities, yes                  | 5  | 2.60 (1.39-4.89)  | 85.6 | <0.001 |
| Adjustment for lifestyle factors, yes <sup>6</sup> | 4  | 2.12 (0.83-5.44)  | 82.9 | 0.001  |
| Adjustment for education, yes                      | 1  | 8.00 (5.60-11.43) | -    | -      |
| Adjustment for geographic areas, yes               | 3  | 3.92 (1.16-13.29) | 75.0 | 0.018  |

BDC, bile duct cancer; CCA, cholangiocarcinoma; EBDC, extrahepatic bile duct cancer; EHC, extrahepatic cholangiocarcinoma; OR, odds ratio; NOS, Newcastle-Ottawa Scale.

<sup>1</sup> OR (Odds ratio) refers to summary estimate of effects based on random effects model. <sup>2</sup> one study [30] suggested the risk estimates of both EBDC and CCA. <sup>3</sup> Non-Asia including U.S. and European areas. <sup>4</sup> Study period is defined by the study's starting point (a) and ending point (b). Before 2000, (a) and (b) are both before 2000; Around 2000, (a) is before 2000 but (b) is after 2000; After 2000, (a) and (b) are both after 2000. <sup>5</sup> The quality score equal or more than median value was judged as high NOS ( $\geq 7$ ). <sup>6</sup> Adjustment for lifestyle factors such as alcohol, smoking, BMI, or etc.
