# Supplementary material for: Association between gallstones and the risk of biliary tract cancer: a systematic review and meta-analysis
Source: PubMed Central journal article supplement (PMC8060519; doi:10.4178/epih.e2021011), 2021-02-03
Supplement: epih-43-e2021011-suppl4.pdf [file epih-43-e2021011-suppl4.pdf]

**Supplementary Material 4. Meta-analysis results for association between presence of gallstone and the risk of AOVC by subgroups**

| Subgroup                          | No. of study | OR (95%CI) <sup>1 *1</sup> | I <sup>2</sup> value (%) | P for heterogeneity |
|-----------------------------------|--------------|----------------------------|--------------------------|---------------------|
| All studies                       | 5            | 3.28 (1.33-8.11)           | 93.3                     | <0.001              |
| <b>Study design</b>               |              |                            |                          |                     |
| Cohort study                      | 1            | 2.30 (1.00-5.29)           | -                        | -                   |
| Case-control study                | 4            | 3.56 (1.20-10.54)          | 95.0                     | <0.001              |
| <b>Sex</b>                        |              |                            |                          |                     |
| Male                              | 1            | 3.60 (1.70-7.62)           | -                        | -                   |
| Female                            | 2            | 3.30 (1.41-7.70)           | 43.2                     | 0.185               |
| <b>Ethnicity</b>                  |              |                            |                          |                     |
| Asia                              | 2            | 7.23 (2.49-21.00)          | 88.0                     | 0.004               |
| Non-Asia <sup>2</sup>             | 3            | 1.57 (1.28-1.92)           | 0.0                      | 0.608               |
| <b>Study period <sup>3</sup></b>  |              |                            |                          |                     |
| Before 2000                       | 1            | 1.88 (0.61-5.79))          | -                        | -                   |
| Around 2000                       | 2            | 2.46 (0.91-6.61)           | 92.1                     | <0.001              |
| After 2000                        | 1            | 12.47 (7.37-21.10)         | -                        | -                   |
| No record                         | 1            | 2.30 (1.00-5.29)           | -                        | -                   |
| <b>Measure of gallstone</b>       |              |                            |                          |                     |
| Medical record with imaging       | 2            | 7.23 (2.49-21.00)          | 88.0                     | 0.004               |
| Medical record without imaging    | 3            | 1.57 (1.28-1.92)           | 0.0                      | 0.608               |
| <b>Study quality <sup>4</sup></b> |              |                            |                          |                     |

|                               |   |                  |      |        |
|-------------------------------|---|------------------|------|--------|
| High NOS                      | 4 | 4.18 (1.79-9.80) | 83.4 | <0.001 |
| Low NOS                       | 1 | 1.52 (1.23-1.88) | -    | -      |
| Adjustment for age, yes       | 4 | 2.29 (1.26-4.17) | 77.0 | 0.005  |
| Adjustment for sex, yes       | 3 | 2.39 (1.17-4.91) | 84.6 | 0.001  |
| Adjustment for education, yes | 1 | 4.20 (2.50-7.06) | -    | -      |

AOVC, ampulla of Vater cancer; OR, odds ratio; NOS, Newcastle-Ottawa Scale.

<sup>1</sup> OR (Odds ratio) refers to summary estimate of effects based on random effects model. <sup>2</sup> Non-Asia including U.S. and European areas. <sup>3</sup> Study period is defined by the study's starting point (a) and ending point (b). Before 2000, (a) and (b) are both before 2000; Around 2000, (a) is before 2000 but (b) is after 2000; After 2000, (a) and (b) are both after 2000. <sup>4</sup> The quality score equal or more than median value was judged as high NOS ( $\geq 7$ ).
