# Supplementary material for: Association between gallstones and the risk of biliary tract cancer: a systematic review and meta-analysis
Source: PubMed Central journal article supplement (PMC8060519; doi:10.4178/epih.e2021011), 2021-02-03
Supplement: epih-43-e2021011-suppl5.pdf [file epih-43-e2021011-suppl5.pdf]

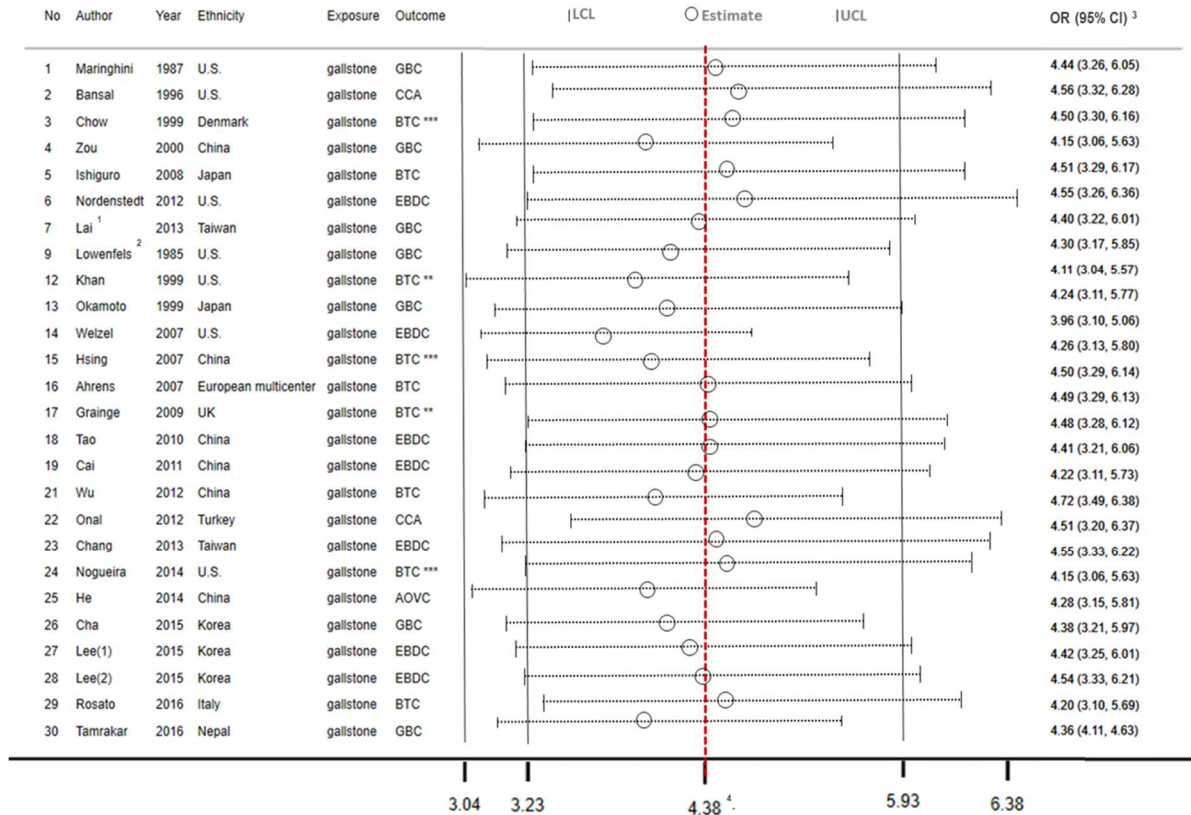

**Supplementary Material 5. Sensitivity analysis showing the relationship between gallstones and the BTC risk**

<sup>1</sup> Effect size of Lai et al. was calculated by pooling the results of DM group and non-DM group.

<sup>2</sup> Effect size of Lowenfels et al. was calculated by pooling the results of indian and non-indian group.

<sup>3</sup> OR (Odds ratio) and 95% CI (Confidence interval) refers to the summary estimate of effects in a random effects model if each one of the study is excluded.

<sup>4</sup> Summary risk estimate of effects in a random effects model where all the study is included

\*\* Pooled the results of two types BTC subsites.

\*\*\* Pooled the results of three types BTC subsites.
