# Supplementary material for: Association between gallstones and the risk of biliary tract cancer: a systematic review and meta-analysis
Source: PubMed Central journal article supplement (PMC8060519; doi:10.4178/epih.e2021011), 2021-02-03
Supplement: epih-43-e2021011-suppl6.pdf [file epih-43-e2021011-suppl6.pdf]

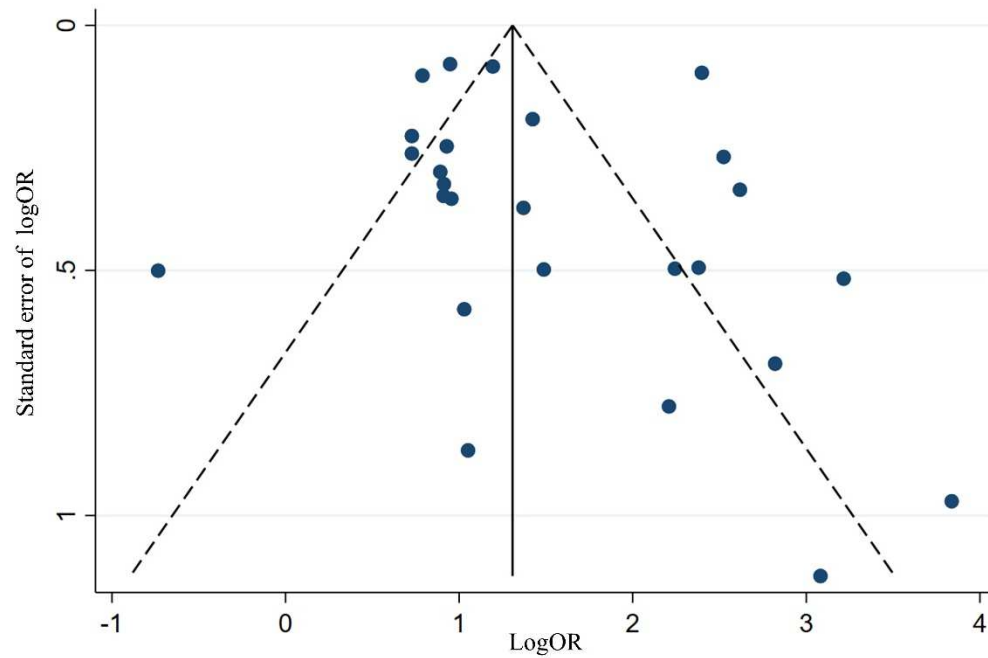

**Supplementary Material 6A. Funnel plot showing the relationship between gallstone and the BTC risk.**

Pseudo 95% confidence limits indicated as dotted line. Egger's regression asymmetry test (BTC,  $t=0.79$ ,  $p=0.421$ ).

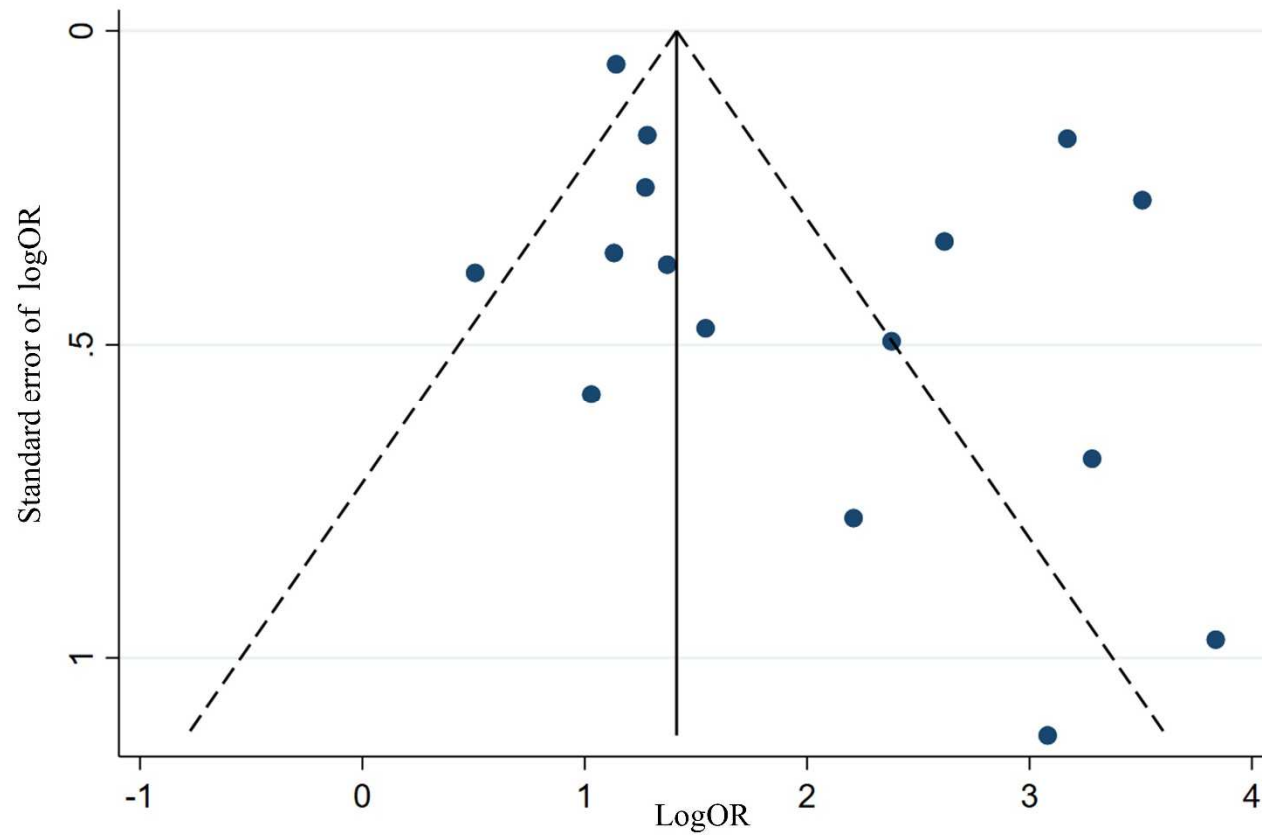

**Supplementary Material 6B. Funnel plot showing the relationship between gallstone and the GBC risk.** Pseudo 95% confidence limits indicated as dotted line. Egger's regression asymmetry test (GBC,  $t=1.98$ ,  $p=0.068$ ).

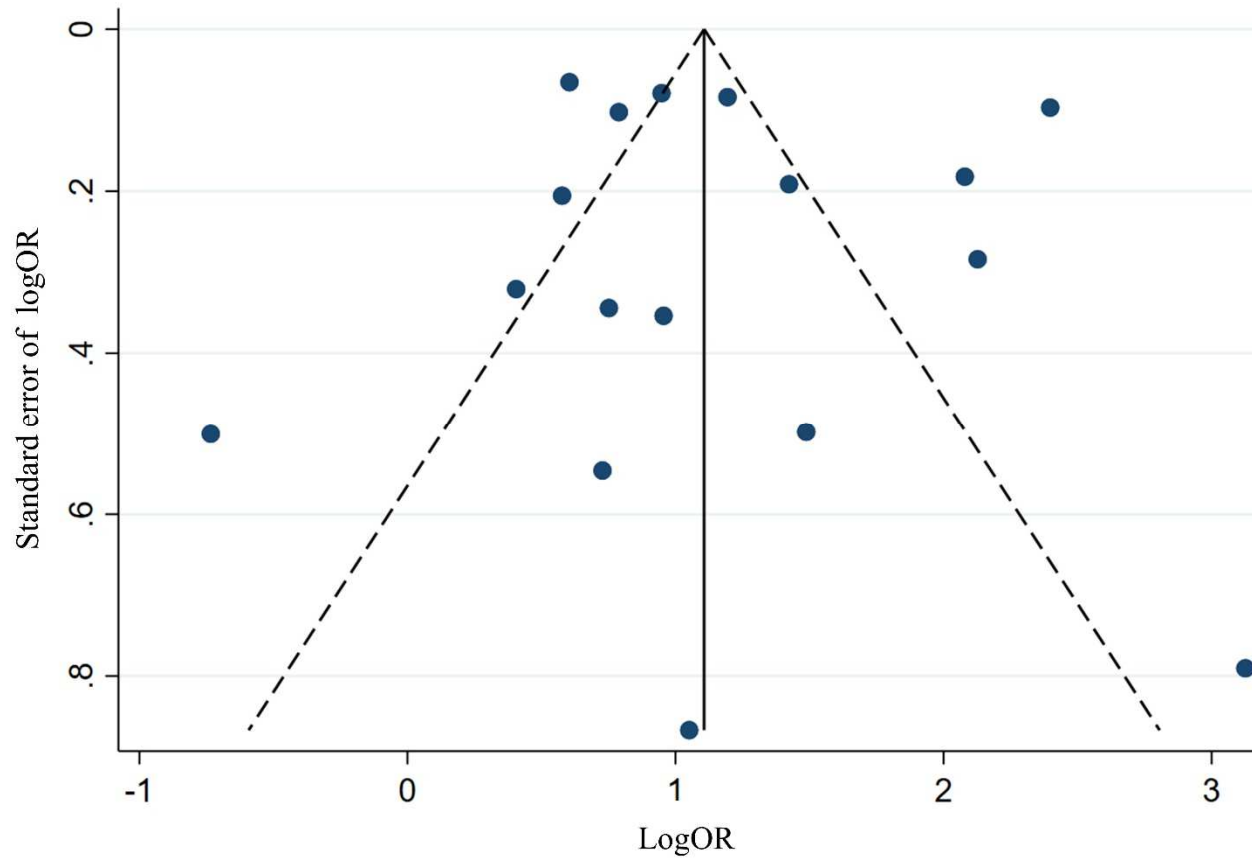

**Supplementary Material 6C. Funnel plot showing the relationship between gallstone and the EBDC risk.**

Pseudo 95% confidence limits indicated as dotted line. Egger's regression asymmetry test (EBDC,  $t=0.41$ ,  $p=0.688$ ).

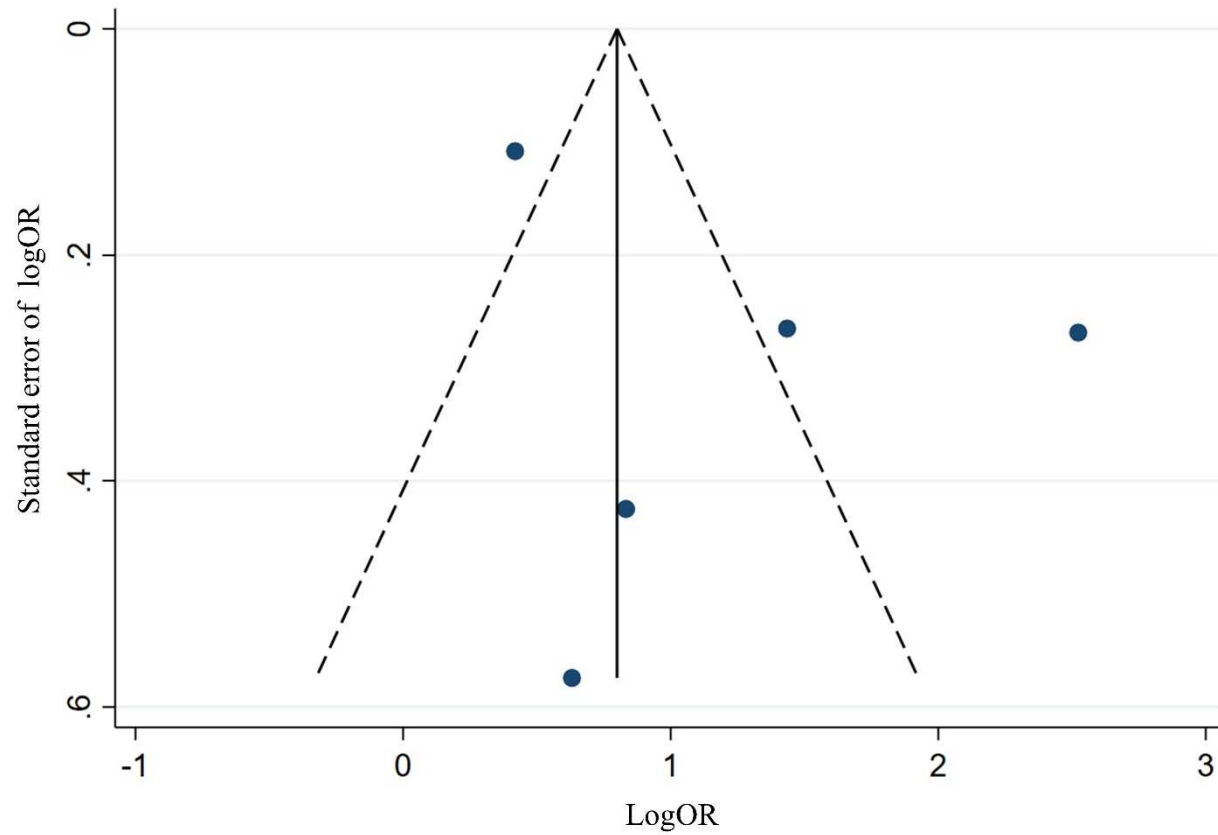

**Supplementary Material 6D. Funnel plot showing the relationship between gallstone and the AOVC risk.**  
Pseudo 95% confidence limits indicated as dotted line. Egger's regression asymmetry test (AOVC,  $t=1.13$ ,  $p=0.340$ ).
