# Supplementary material for: Association between gallstones and the risk of biliary tract cancer: a systematic review and meta-analysis
Source: PubMed Central journal article supplement (PMC8060519; doi:10.4178/epih.e2021011), 2021-02-03
Supplement: epih-43-e2021011-suppl7.pdf [file epih-43-e2021011-suppl7.pdf]

**Supplementary Material 7. Systematic review and meta-analysis results for association between gallstone characteristics and the risk of BTC**

| Characteristics      | No. of study | OR (95%CI) <sup>1</sup> | I <sup>2</sup> value (%) | <i>P</i> for heterogeneity |
|----------------------|--------------|-------------------------|--------------------------|----------------------------|
| Size (≥1cm vs. <1cm) | 4            | 1.88 (1.10-3.22)        | 35.2                     | 0.201                      |
| Size (≥2cm vs. <2cm) | 3            | 2.62 (0.90-7.60)        | 73.8                     | 0.022                      |
| Number (>1 vs. 1)    | 2            | 2.10 (0.80-5.47)        | 63.8                     | 0.096                      |

Abbreviations: BTC (biliary tract cancer), OR (odds ratio).

<sup>1</sup> OR refers to summary estimate of effects based on random effects model.
